# Supplementary figures and images for: Validity and Reproducibility of a Food Frequency Questionnaire to Assess Macro and Micro-Nutrient Intake among a Convenience Cohort of Healthy Adult Qataris
Source: MDPI journal article supplement (doi:10.3390/nu13062002), 2021-06-10

**Figure S1.** Bland-Altman plot for energy, carbohydrate, protein, fat intake.

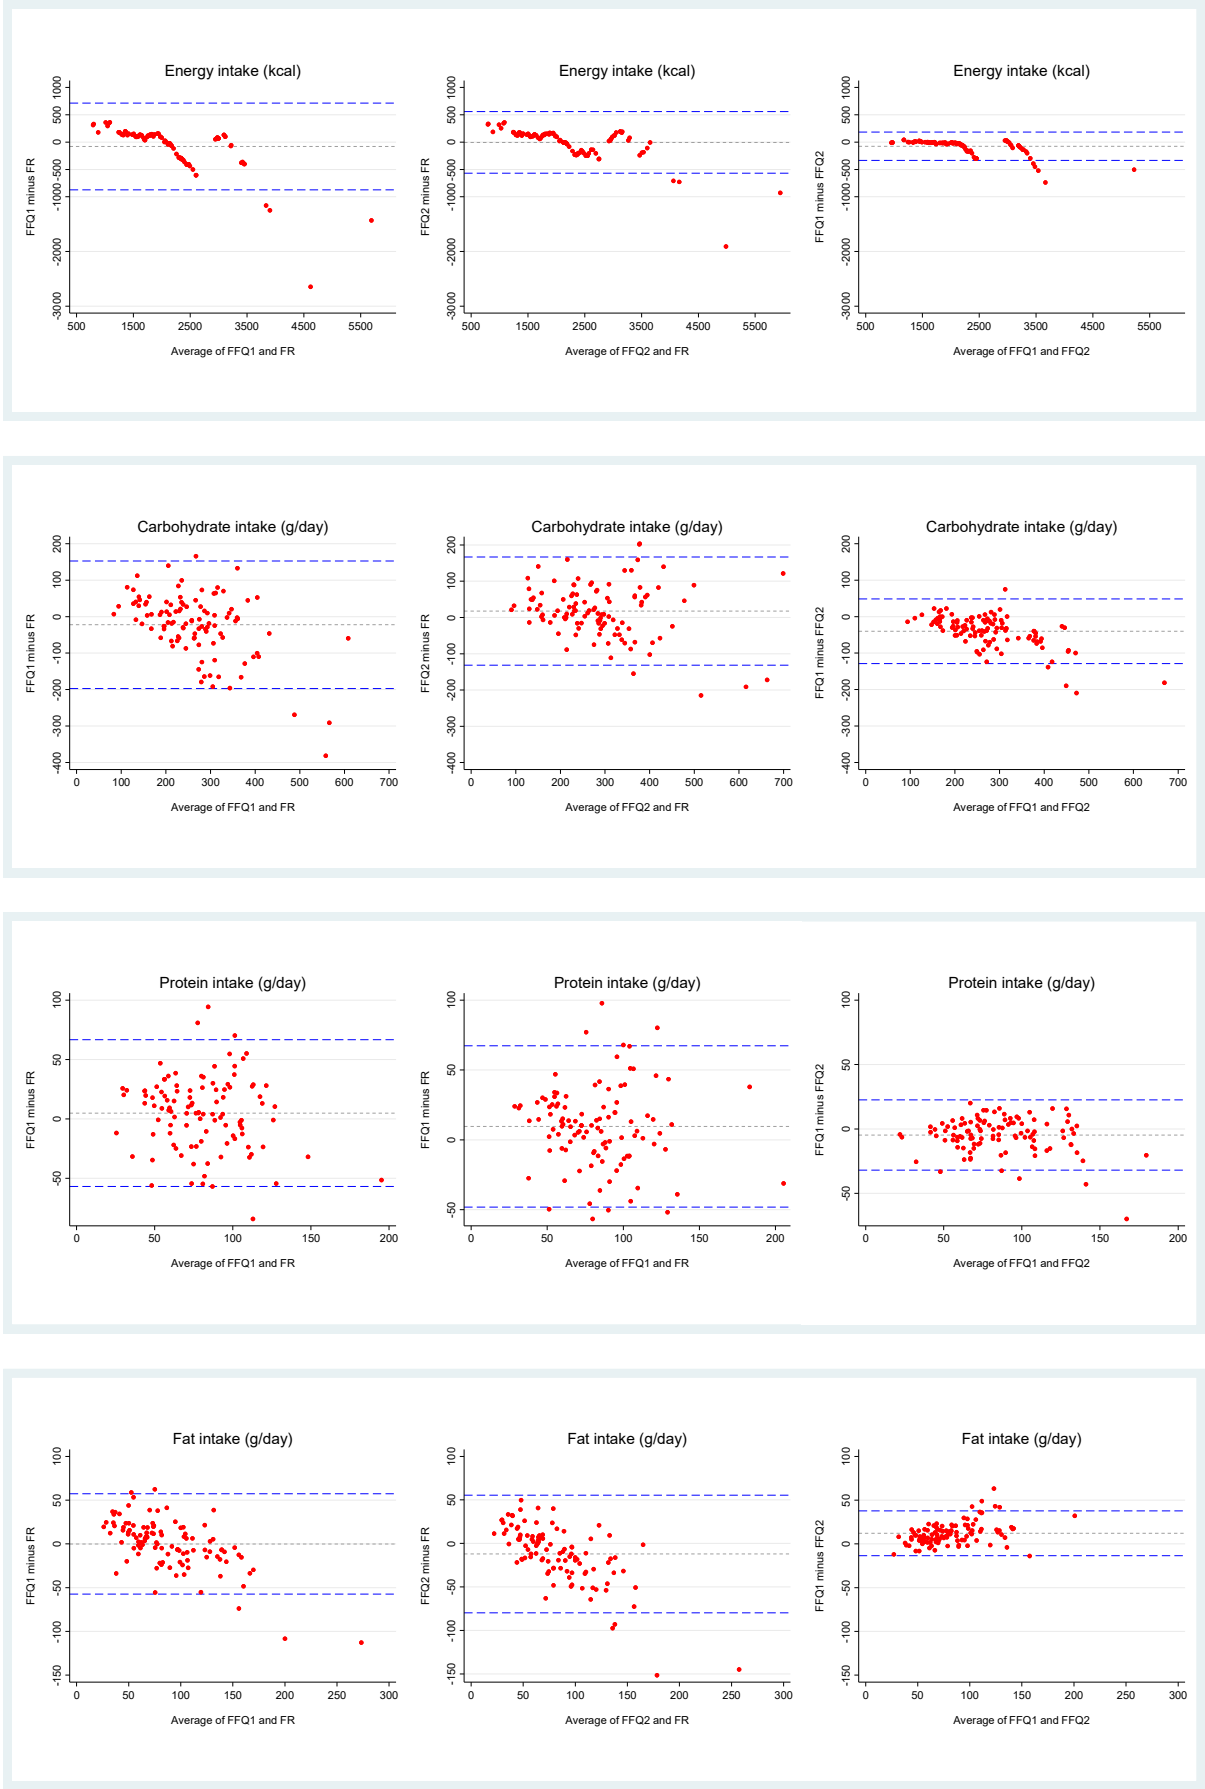

Supplement: s1 [file s1]
